# Supplementary material for: Panel-based NGS Reveals Novel Pathogenic Mutations in Autosomal Recessive Retinitis Pigmentosa
Source: PubMed Central journal article supplement (PMC4726392; doi:10.1038/srep19531), 2016-01-25
Supplement: srep19531-s1.pdf [file srep19531-s1.pdf]

## Panel-based NGS Reveals Novel Pathogenic Mutations in Autosomal Recessive Retinitis Pigmentosa

Raquel Perez-Carro<sup>1,2</sup>, Marta Corton<sup>1,2</sup>, Iker Sánchez-Navarro<sup>1,2</sup>, Olga Zurita<sup>1,2</sup>, Noelia Sanchez-Bolivar<sup>1,2</sup>, Rocío Sánchez-Alcudia<sup>1,2</sup>, Stefan H. Lelieveld<sup>3</sup>, Elena Aller<sup>2,4</sup>, Miguel Angel Lopez-Martinez<sup>1,2</sup>, M<sup>a</sup> Isabel López-Molina<sup>5</sup>, Patricia Fernandez-San Jose<sup>1,2</sup>, Fiona Blanco-Kelly<sup>1,2</sup>, Rosa Riveiro-Alvarez<sup>1,2</sup>, Christian Gilissen<sup>3</sup>, Jose M Millan<sup>2,4</sup>, Almudena Avila-Fernandez<sup>1,2,6</sup>, Carmen Ayuso\*<sup>1,2,6</sup>.

**Supplementary Table 1.** Regions not covered in our RD panel.

| Chr | Start position | End position | Gene            | Exon |
|-----|----------------|--------------|-----------------|------|
| 2   | 96967395       | 96967407     | <i>SNRNP200</i> | 4    |
| 2   | 182468774      | 182468826    | <i>CERKL</i>    | 2    |
| 6   | 64497950       | 64498012     | <i>EYS</i>      | 39   |
| 12  | 88471664       | 88471677     | <i>CEP290</i>   | 40   |
| 12  | 88510789       | 88510829     | <i>CEP290</i>   | 18   |
| 17  | 58232683       | 58232718     | <i>CA4</i>      | 2    |
| X   | 46713082       | 46713137     | <i>RP2</i>      | 2    |
