# Supplementary material for: Panel-based NGS Reveals Novel Pathogenic Mutations in Autosomal Recessive Retinitis Pigmentosa
Source: PubMed Central journal article supplement (PMC4726392; doi:10.1038/srep19531), 2016-01-25
Supplement: srep19531-s2.pdf [file srep19531-s2.pdf]

**Panel-based NGS Reveals Novel Pathogenic Mutations in Autosomal Recessive Retinitis Pigmentosa**

Raquel Perez-Carro<sup>1,2</sup>, Marta Corton<sup>1,2</sup>, Iker Sánchez-Navarro<sup>1,2</sup>, Olga Zurita<sup>1,2</sup>, Noelia Sanchez-Bolivar<sup>1,2</sup>, Rocío Sánchez-Alcudia<sup>1,2</sup>, Stefan H. Lelieveld<sup>3</sup>, Elena Aller<sup>2,4</sup>, Miguel Angel Lopez-Martinez<sup>1,2</sup>, M<sup>a</sup> Isabel López-Molina<sup>5</sup>, Patricia Fernandez-San Jose<sup>1,2</sup>, Fiona Blanco-Kelly<sup>1,2</sup>, Rosa Riveiro-Alvarez<sup>1,2</sup>, Christian Gilissen<sup>3</sup>, Jose M Millan<sup>2,4</sup>, Almudena Avila-Fernandez<sup>1,2,6</sup>, Carmen Ayuso\*<sup>1,2,6</sup>.

**Supplementary Table 2.** Clinical findings identified in the index cases of the characterized families.

| Family  | Symptoms and course                                     | Fundus                                                             | ERG                                  | Other features                                                             |
|---------|---------------------------------------------------------|--------------------------------------------------------------------|--------------------------------------|----------------------------------------------------------------------------|
| RP-1147 | NB (16y), VF constriction (30y) and VA diminished (30y) | Bone spicule pigmentation                                          | ND                                   |                                                                            |
| RP-2066 | NB (6y), loss of VF (6y) and VA diminished (10y)        | Bone spicule pigmentation in mid periphery                         | ND                                   |                                                                            |
| RP-2114 | NB (3y), loss of VF (3y) and VA diminished (4y)         | Attenuated vessels and bone spicule pigmentation.                  | NR                                   | Photofobia                                                                 |
| RP-1319 | NB (20y), VF constriction (22y) and loss of VA (28y)    | Bone spicule pigmentation and macular edema.                       | ND                                   |                                                                            |
| RP-1412 | NB (18y), VF constriction (30y) and loss of VA (38y)    | ND                                                                 | ND                                   |                                                                            |
| RP-1646 | NB (48y), VF constriction (48y) and loss of VA (53y)    | Bone spicule pigmentation                                          | ND                                   |                                                                            |
| RP-1695 | NB (7y), loss of VF (13y) and VA diminished (13y)       | ND                                                                 | NR                                   | Photofobia                                                                 |
| RP-1735 | NB (30y), loss of VF (30y) and VA diminished (43y)      | Pale optic disc. Bone spicule pigmentation and attenuated vessels. | Reduced a-wave and b-wave amplitudes | Bilateral sensorineural hearing loss                                       |
| RP-1802 | NB (48y), VF constriction (48y) and loss of VA (53y)    | Bone spicule pigmentation                                          | ND                                   | Posterior subcapsular cataract (45y)                                       |
| RP-1976 | NB (40y), VF constriction (50y) and loss of VA (56y)    | Pale optic disc. Bone spicule pigmentation and attenuated vessels. | NR                                   | Posterior subcapsular cataract (66y) Photofobia                            |
| RP-1979 | NB (30y), VF constriction (30y) and loss of VA (33y)    | Pale optic disc. Bone spicule pigmentation and attenuated vessels. | NR                                   | Posterior subcapsular cataract (49y). Bilateral sensorineural hearing loss |
| RP-2112 | NB (30y), loss of VF (36y) and VA diminished (39y)      | Bone spicule pigmentation                                          | NR                                   |                                                                            |
| RP-2113 | NB (35y), loss of VF (50y) and VA diminished (55y)      | Pale optic disc. Bone spicule pigmentation                         | ND                                   | Posterior subcapsular cataract (62y). Photofobia                           |
| RP-1543 | NB (20y), VF constriction (23y) and loss of VA (8y)     | Pale optic disc. Bone spicule pigmentation                         | NR                                   | Nystagmus                                                                  |
| RP-1056 | NB (21y), loss of VF (28y) and VA diminished (30y)      | ND                                                                 | ND                                   | Posterior subcapsular cataract (38y)                                       |
| RP-1998 | NB (12y), loss of VF (12y) and VA diminished (27y)      | Attenuated vessels and initial pigment deposits                    | Reduced a-wave and b-wave amplitudes |                                                                            |
| RP-1706 | NB (10y), VF constriction (6y) and loss of VA (15y)     | Pale optic disc. Bone spicule pigmentation and attenuated vessels. | NR                                   | Posterior subcapsular cataract (42y)                                       |
| RP-1929 | NB (10y), VF constriction (10y) and loss of VA (10y)    | Pale optic disc. Bone spicule pigmentation                         | ND                                   | Posterior subcapsular cataract (70y)                                       |
| RP-1142 | NB (<10y), loss of VF (<10y) and VA diminished (<10y)   | Pale optic disc. Bone spicule pigmentation and attenuated vessels. | NR                                   | Posterior subcapsular cataract (70y). Dyschromatopsia                      |
| RP-0372 | NB (5y), loss of VF (5y) and VA diminished (5y)         | Bone spicule pigmentation and attenuated vessels.                  | Reduced a-wave and b-wave amplitudes |                                                                            |
| RP-0040 | NB (25y), VF constriction (25y) and loss of VA (28y)    | Pale optic disc. Bone spicule pigmentation and attenuated vessels. | NR                                   | Posterior subcapsular cataract (34y)                                       |
| RP-1772 | NB (20y), VF constriction (35y) and loss of VA (45y)    | Bone spicule pigmentation and attenuated vessels.                  | Reduced a-wave and b-wave amplitudes | Photofobia                                                                 |
| RP-1988 | NB (6y), VF constriction (6y) and loss of VA (6y)       | Bone spicule pigmentation and attenuated vessels.                  | ND                                   | Photofobia. Dyschromatopsia                                                |
| RP-1201 | NB (16y), loss of VF (20y) and VA diminished (26y)      | ND                                                                 | ND                                   |                                                                            |
| RP-0338 | NB (35y), loss of VF (35y) and VA diminished (35y)      | Bone spicule pigmentation in mid periphery and attenuated vessels  | NR                                   | Bilateral sensorineural hearing loss                                       |
| RP-0344 | NB (21y), VF constriction (28y)                         | Pale optic disc. Bone spicule pigmentation and attenuated vessels. | NR                                   | Photofobia. Bilateral sensorineural hearing loss                           |
| RP-0456 | NB (38y), VF constriction (40y) and loss of VA (42y)    | ND                                                                 | ND                                   | Posterior subcapsular cataract (40y)                                       |

Abbreviations: NB(night blindness); VF(VF); VA(visual acuity);ERG(electroretinogram); NR( non-recordable);ND(no data).
