# Supplementary material for: Panel-based NGS Reveals Novel Pathogenic Mutations in Autosomal Recessive Retinitis Pigmentosa
Source: PubMed Central journal article supplement (PMC4726392; doi:10.1038/srep19531), 2016-01-25
Supplement: srep19531-s3.pdf [file srep19531-s3.pdf]

## Panel-based NGS Reveals Novel Pathogenic Mutations in Autosomal Recessive Retinitis Pigmentosa

Raquel Perez-Carro<sup>1,2</sup>, Marta Corton<sup>1,2</sup>, Iker Sánchez-Navarro<sup>1,2</sup>, Olga Zurita<sup>1,2</sup>, Noelia Sanchez-Bolivar<sup>1,2</sup>, Rocío Sánchez-Alcudia<sup>1,2</sup>, Stefan H. Lelieveld<sup>3</sup>, Elena Aller<sup>2,4</sup>, Miguel Angel Lopez-Martinez<sup>1,2</sup>, M<sup>a</sup> Isabel López-Molina<sup>5</sup>, Patricia Fernandez-San Jose<sup>1,2</sup>, Fiona Blanco-Kelly<sup>1,2</sup>, Rosa Riveiro-Alvarez<sup>1,2</sup>, Christian Gilissen<sup>3</sup>, Jose M Millan<sup>2,4</sup>, Almudena Avila-Fernandez<sup>1,2,6</sup>, Carmen Ayuso\*<sup>1,2,6</sup>.

**Supplementary Table 3.** Targeted regions identified with a copy number variations. If the ratio fell below 0.7 it was considered a deletion and if rose above 1.2 was considered as duplication.

| Family  | chr | Start position | End position | Gene          | Exon | Ratio | Validation |
|---------|-----|----------------|--------------|---------------|------|-------|------------|
| RP-1706 | 6   | 65596359       | 65596964     | <i>EYS</i>    | 19   | 0.46  | MLPA (+)   |
| RP-1929 | 6   | 65707432       | 65707849     | <i>EYS</i>    | 14   | 0.61  | MLPA (+)   |
|         | 6   | 65767362       | 65767710     | <i>EYS</i>    | 13   | 0.62  | MLPA (+)   |
| RP-2112 | 1   | 215986857      | 215987433    | <i>USH2A</i>  | 49   | 0.51  | MLPA (+)   |
|         | 1   | 215990172      | 215990713    | <i>USH2A</i>  | 48   | 0.53  | MLPA (+)   |
|         | 1   | 216011212      | 216011614    | <i>USH2A</i>  | 47   | 0.47  | MLPA (+)   |
|         | 1   | 216017384      | 216018005    | <i>USH2A</i>  | 46   | 0.48  | MLPA (+)   |
|         | 1   | 216019005      | 216019497    | <i>USH2A</i>  | 45   | 0.46  | MLPA (+)   |
| RP-0830 | 12  | 88471664       | 88471865     | <i>CEP290</i> | 40   | 1.24  | aCGH (-)   |
|         | 12  | 88522578       | 88523012     | <i>CEP290</i> | 11   | 1.25  | aCGH (-)   |
